# Supplementary material
Source: HighWire-hosted journal article supplement (https://bmjopen.bmj.com/content/11/10/e040795)
Supplement: inline-supplementary-material-1 [file inline-supplementary-material-1.pdf]

**Supplement Table 1** Cox Proportional Hazards Models of ten-Year Mortality Categorized by VCDR of different cut-off.

|             | Participants,<br>N | Died,<br>N | Mortality Rate,<br>%(95%CI) | HR (95% CI)     |         |                            |         |                            |         |
|-------------|--------------------|------------|-----------------------------|-----------------|---------|----------------------------|---------|----------------------------|---------|
|             |                    |            |                             | Univariable     | P-value | Age and Gender<br>Adjusted | P-value | Multivariable<br>Adjusted† | P-value |
| <b>VCDR</b> |                    |            |                             |                 |         |                            |         |                            |         |
| ≤0.5        | 1012               | 197        | 19.5(17.1,22.0)             | Reference [1]   |         | Reference [1]              |         | Reference [1]              |         |
| >0.5        | 308                | 80         | 26.0(21.2,31.2)             | 1.37(1.06,1.78) | 0.016   | 1.10 (0.84,1.43)           | 0.500   | 1.11 (0.82,1.51)           | 0.490   |
| <b>VCDR</b> |                    |            |                             |                 |         |                            |         |                            |         |
| <0.7        | 1160               | 229        | 19.7(17.5,22.2)             | Reference [1]   |         | Reference [1]              |         | Reference [1]              |         |
| ≥0.7        | 160                | 48         | 30.0(23.0,37.7)             | 1.62(1.18,2.20) | 0.003   | 1.16 (0.84,1.59)           | 0.367   | 1.15 (0.80,1.67)           | 0.445   |

Abbreviations: IOP=Intraocular pressure, VCDR=Vertical cup disc ration, HR= Hazard ratio, CI=confidence interval.

† Adjusted for age, gender, education, income, body mass index, presenting visual impairment, history of diabetes and hypertension
